# Supplementary material for: Liposomal Formulations Loaded with a Eugenol Derivative for Application as Insecticides: Encapsulation Studies and In Silico Identification of Protein Targets
Source: MDPI journal article supplement (doi:10.3390/nano12203583), 2022-10-13
Supplement: s1 [file s1]

# Supplementary Material

## Liposomal formulations loaded with a eugenol derivative for application as insecticides: encapsulation studies and in silico identification of protein targets

Maria José G. Fernandes<sup>1</sup>, Renato B. Pereira<sup>2</sup>, Ana Rita O. Rodrigues<sup>3,4</sup>, Tatiana F. Vieira<sup>5,6</sup>, A. Gil Fortes<sup>1</sup>, David M. Pereira<sup>2</sup>, Sérgio F. Sousa<sup>5,6</sup>, M. Sameiro T. Gonçalves<sup>1</sup>, Elisabete M. S. Castanheira<sup>3,4,\*</sup>

\* [ecoutinho@fisica.uminho.pt](mailto:ecoutinho@fisica.uminho.pt)

<sup>1</sup> Centre of Chemistry, Department of Chemistry, University of Minho, *Campus* of Gualtar, 4710-057 Braga, Portugal.

<sup>2</sup> REQUIMTE/LAQV, Laboratory of Pharmacognosy, Department of Chemistry, Faculty of Pharmacy, University of Porto, R. Jorge Viterbo Ferreira, 228, 4050-313 Porto, Portugal.

<sup>3</sup> Physics Centre of Minho and Porto Universities (CF-UM-UP), University of Minho, *Campus* of Gualtar, 4710-057 Braga, Portugal.

<sup>4</sup> Associate Laboratory LaPMET - Laboratory of Physics for Materials and Emergent Technologies, University of Minho, *Campus* of Gualtar, 4710-057 Braga, Portugal.

<sup>5</sup> UCIBIO/REQUIMTE, BioSIM – Department of Medicine, Faculty of Medicine, University of Porto, Alameda Prof. Hernâni Monteiro, 4200-319 Porto, Portugal.

<sup>6</sup> Associate Laboratory i4HB - Institute for Health and Bioeconomy, Faculty of Medicine, University of Porto, 4200-319 Porto, Portugal.

### 1. Creation of a Homology Model

The model generated by SWISS-MODEL for 1QON was used in the MD simulations since the gap that was missing from the original structure was distant from the active site.

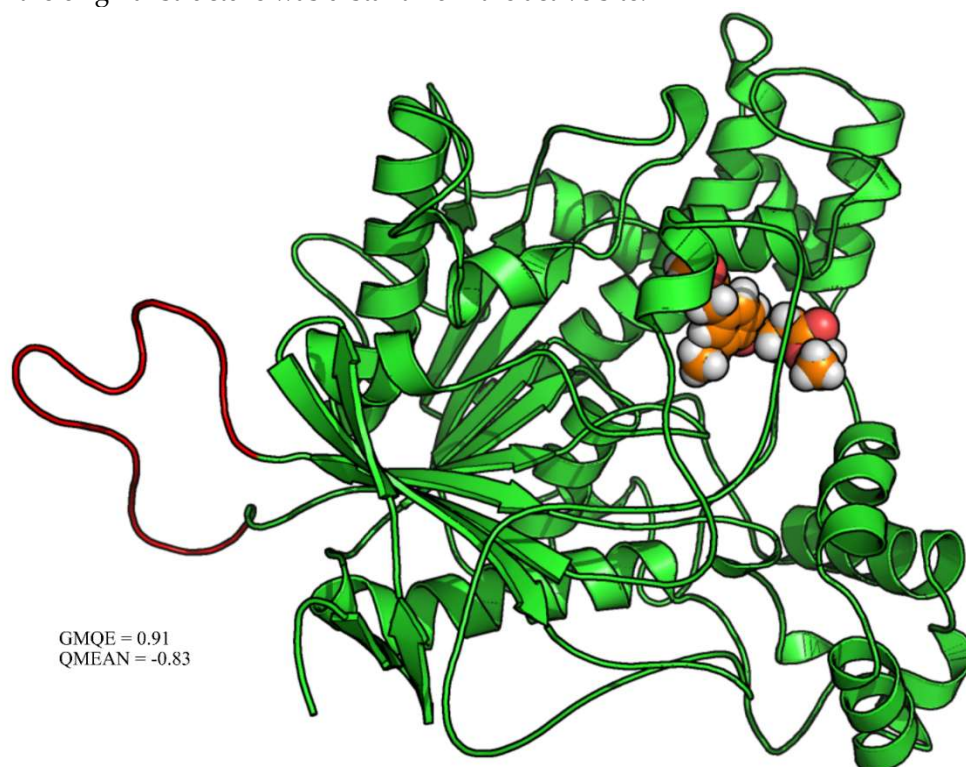

**Figure S1.** Homology model built for 1QON. Green is the original structure and red represents the loop that was generated by SWISS-MODEL. In orange is the ligand molecule (compound 1). GMQE - Global Model Quality Estimation, is expressed between 0 and 1 with a higher number meaning higher reliability. QMEAN - provides an estimate of the "degree of nativeness" of the structural features observed in the model. A value of QMEAN around zero indicate a good agreement between the model and experimental structure.

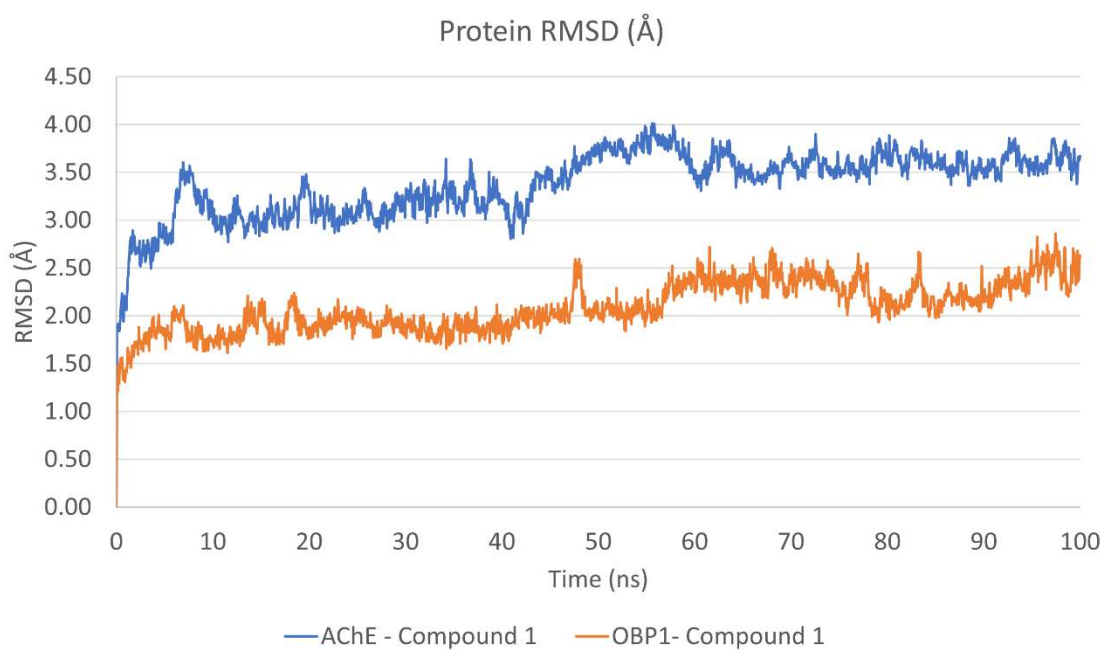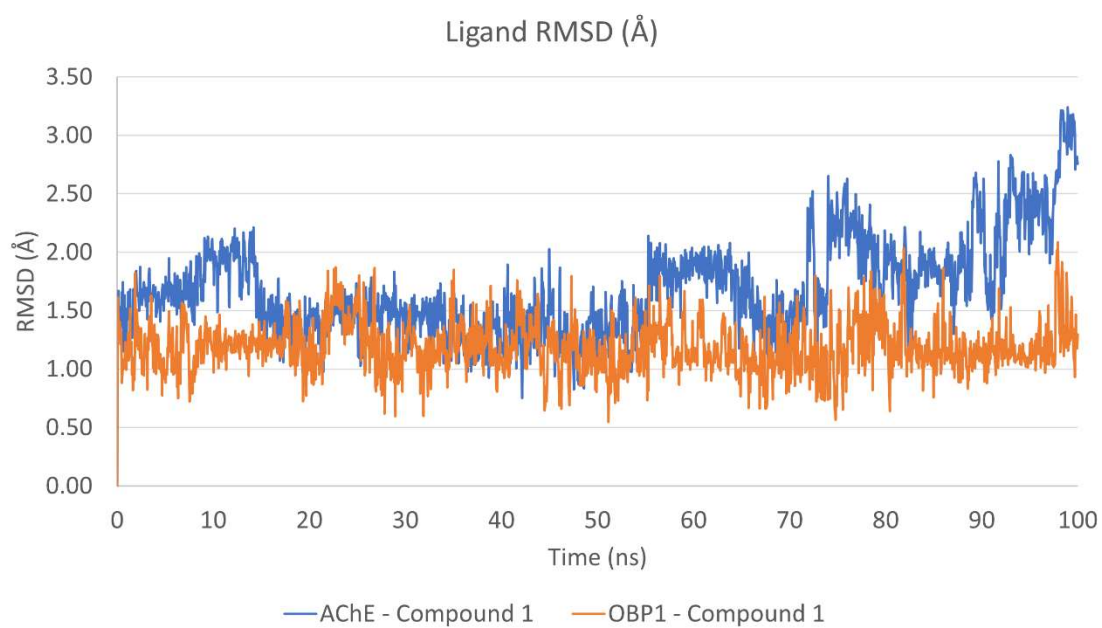

**Figure S2.** Protein and ligand RMSD (Å) of the AChE and OBP – ligand complexes.

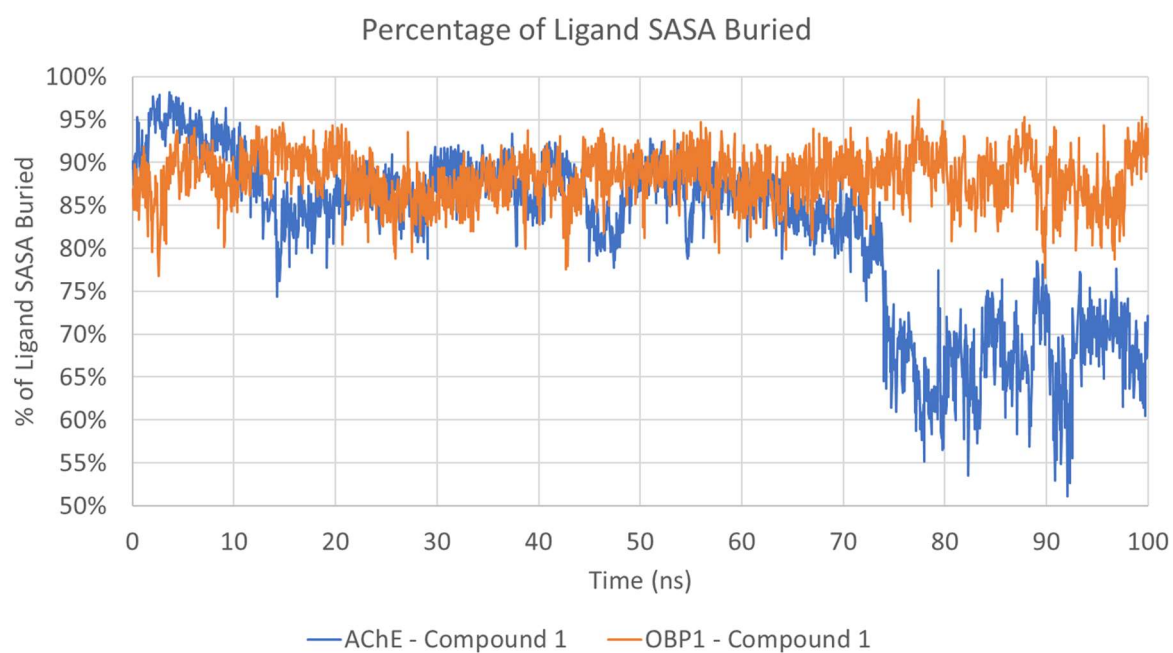

**Figure S3.** Percentage of the potential solvent accessible surface area of the ligands that is buried by the protein targets evaluated.

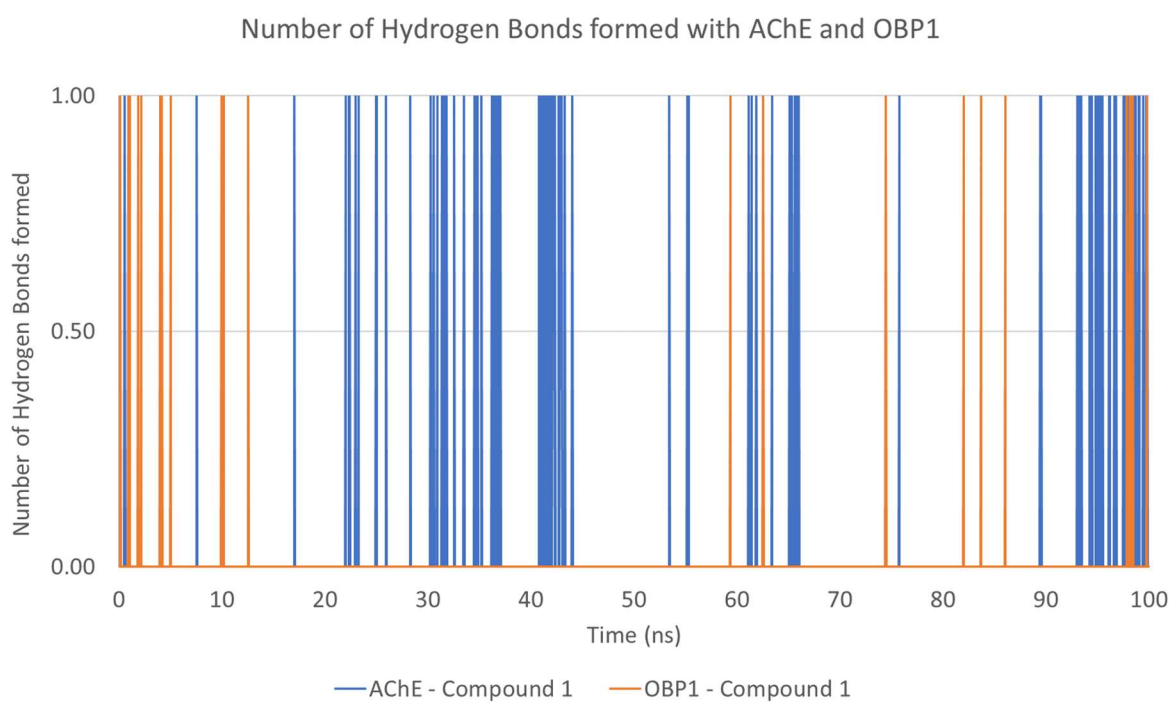

**Figure S4.** Number of ligand-target hydrogen bonds formed during the simulations for compound 1 when complexed with AChE and OBP.

## 2. Encapsulation studies

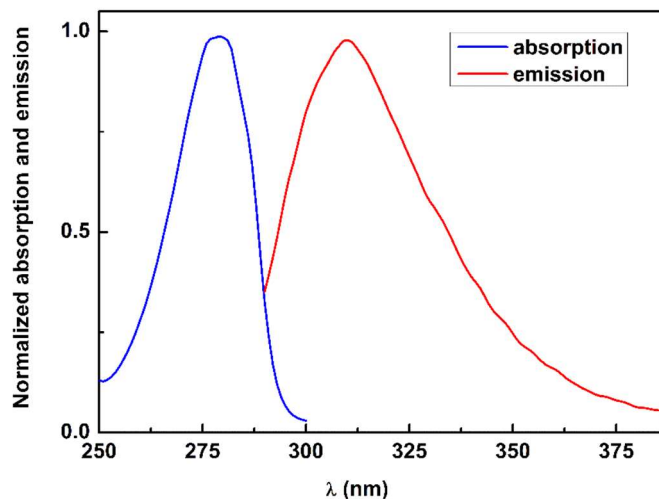

**Figure S5.** Normalized absorption and fluorescence emission (excitation at 280 nm) spectra of compound 1 in ethanol ( $1 \times 10^{-5}$  M for absorption and  $1 \times 10^{-6}$  M for emission).

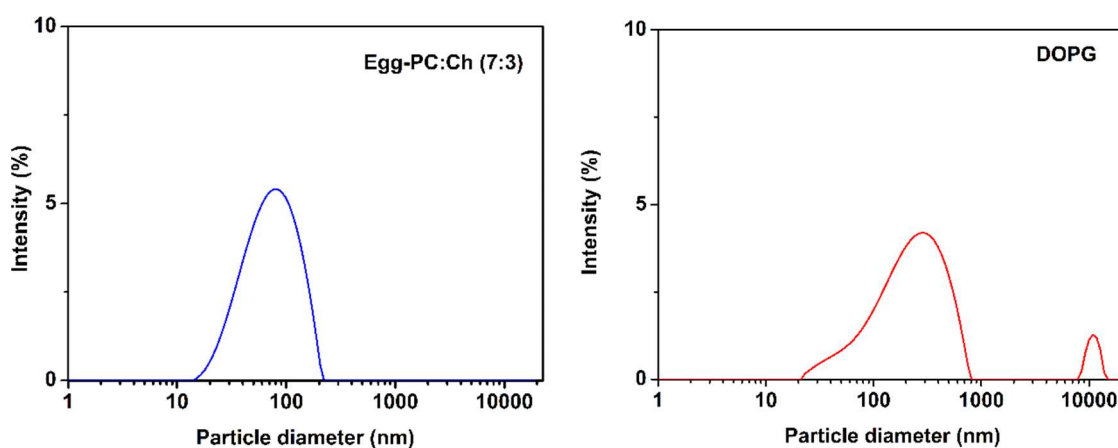

**Figure S6.** Examples of size distributions of compound-loaded liposomes obtained from DLS measurements.

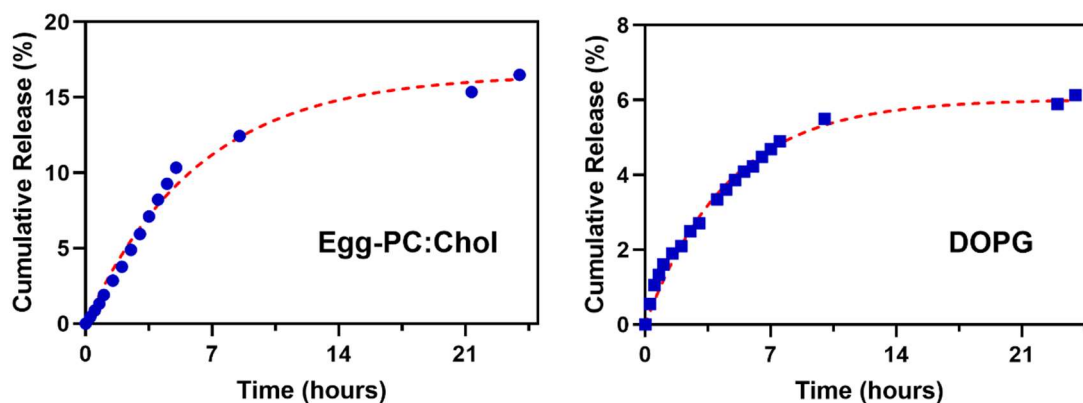

**Figure S7.** Cumulative release (for 24 h) of compound 1 from liposomes of Egg-PC:Cholesterol (left) and DOPG (right) liposomes fitted to the first-order kinetic model.

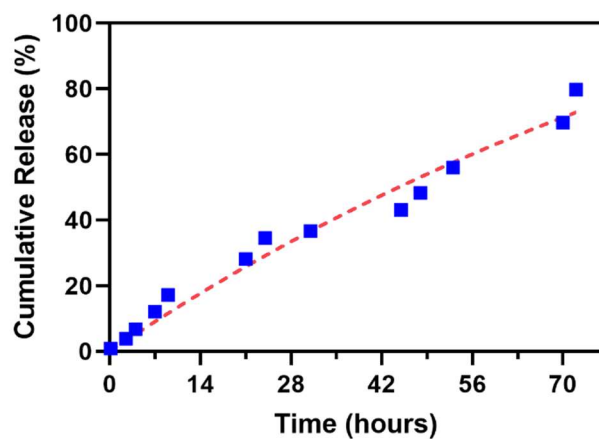

**Figure S8.** Cumulative release (for 72 h) of compound 1 from liposomes of Egg-PC:Cholesterol.

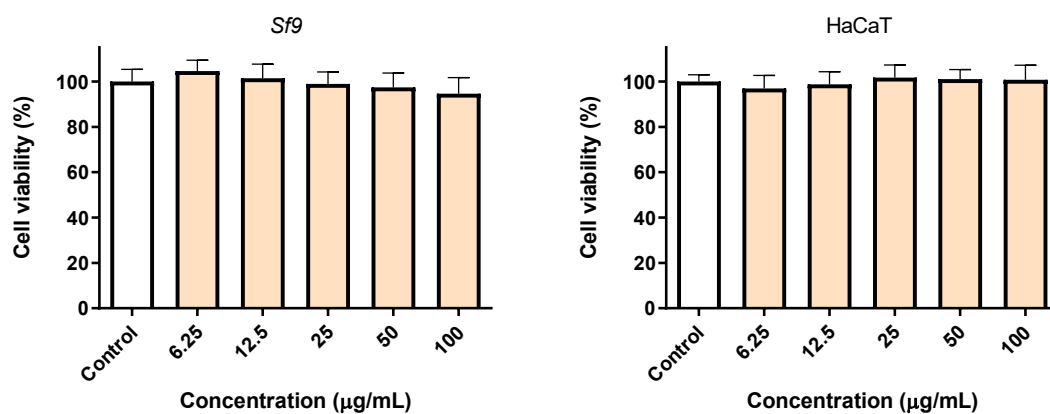

**Figure S9.** Viability of *Sf9* and HaCaT cells exposed to drug-free liposomes (6.25 – 100 µg/mL), medium (control). Cells were incubated for 72 h, after which viability was evaluated.
